# Supplementary material for: The accuracy of different mismatch negativity amplitude representations in predicting the levels of consciousness in patients with disorders of consciousness
Source: Frontiers journal article supplement (doi:10.3389/fnins.2023.1293798), 2023-12-21
Supplement: Data_Sheet_1.PDF [file Data_Sheet_1.PDF]

# **The Accuracy of Different Mismatch Negativity Amplitude Representations in Predicting the Levels of Consciousness in Patients with Disorders of Consciousness**

**Kang Zhang<sup>1</sup>, Kexin Li<sup>3</sup>, ChunyunZhang<sup>6</sup>, Xiaodong Li<sup>4</sup>, Shuai Han<sup>1</sup>,  
Chuanxiang Lv<sup>1</sup>, Jingwei Xie<sup>2</sup>, Li Bie<sup>1\*</sup>, Yongkun Guo<sup>2,5\*</sup>**

<sup>1</sup> Department of Neurosurgery, The First Hospital of Jilin University, Changchun, China

<sup>2</sup> Department of Neurosurgery, Fifth Affiliated Hospital of Zhengzhou University, Zhengzhou, China

<sup>3</sup> Department of Endocrinology, Jilin Province People's Hospital, Changchun, China

<sup>4</sup> Department of Neurosurgery, Siping Central People's Hospital, Siping, China

<sup>5</sup> Henan Key Laboratory of Brain Science and Brain Computer Interface Technology, Zhengzhou, China

<sup>6</sup> Department of Neurosurgery, Qilu Hospital of Shandong University(Qingdao), Qingdao, China

## **\* Correspondence:**

Li Bie, Department of Neurosurgery, The First Hospital of Jilin University, No.1 Xinmin Street, Changchun, Jilin Province ,130021, China. E-mail: [bie\\_li@jlu.edu.cn](mailto:bie_li@jlu.edu.cn)

Yongkun Guo, Department of Neurosurgery, The Fifth Affiliated Hospital of Zhengzhou University, Zhengzhou; Henan Engineering Research Center for Prevention and Treatment of

Brain Injury, 3 Kangfuqian Street, Erqi District, Zhengzhou, Henan 450052, China. E-mail:

[yongkunhope@126.com](mailto:yongkunhope@126.com)

**Keywords: disorders of consciousness, mismatch negativity, microstate, functional connectivity, accuracy**

**Supplementary Table 1.** Results of statistical testing for the duration of four microstates between conditions S and D.

| Mean(SD)   | D            | S           | P-value |
|------------|--------------|-------------|---------|
| <b>MS1</b> | 86.71(15.50) | 71.16(7.95) | 0.10    |
| <b>MS2</b> | 16.93(10.75) | 10.45(5.29) | 0.15    |
| <b>MS3</b> | 7.49(4.72)   | 7.34(5.09)  | 1.00    |
| <b>MS4</b> | 19.34(4.30)  | 13.04(6.66) | 0.18    |

*MS1, MS2, MS3, and MS4 refer to four microstates respectively; D and S refer to condition D and condition S, respectively; SD, standard deviation.*

**Supplementary Table 2.** Results of statistical testing for the duration of four microstates between MCS and VS groups.

| Mean(SD)   | MCS           | VS           | P-value |
|------------|---------------|--------------|---------|
| <b>MS1</b> | 65.43 (14.25) | 63.91(15.35) | 0.87    |
| <b>MS2</b> | 14.05(8.62)   | 13.28(8.02)  | 0.93    |
| <b>MS3</b> | 9.16 (5.85)   | 5.83 (4.90)  | 0.20    |
| <b>MS4</b> | 16.68(13.45)  | 15.66(11.32) | 0.99    |

*MS1, MS2, MS3, and MS4 refer to four microstates respectively; MCS, minimally conscious state; VS, vegetative state; SD, standard deviation.*
